# Supplementary material
Source: Springer Nature journal article supplement (https://www.springermedizin.de/resource/supplementary/12881_2009_576_MOESM5_ESM.pdf/9450938)
Supplement: MOESM5 [file 9450938]

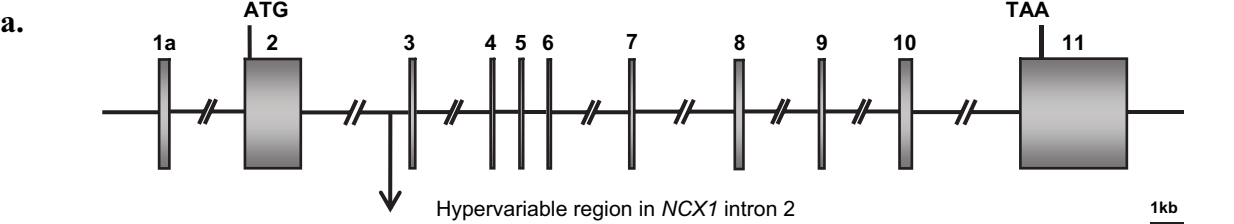

**b.**

Human TAGGATTGAGCCCTGTCACTGAGTCTTC (CATT C) CTCTATCTCGCCTGTTCTAATTTAT 60  
 Chimp TAGGATTGAGCCCTGTCACTGAGTCTTC CATT C CTCTATCTCGCCTGTTCTAATTTAT 60  
 Rhesus TAGGATTTAGCCCTGTCACTGACTCTTC CATT C CTCTATCTCGCCTGTTCTAATTTAT 60  
 \*\*\*\*\*

C/g SNP

43bp deletion polymorphism

10bp deletion

40bp duplicon unit A

Human TTCTCTATTTCTTTC **ATTTCCTTCCTGACTGTCTT (CATT C) TTGCTTTTTATT** CT TT CTC 120  
 Chimp TTCTCTATTTCTTTC -----CTTGACTGTCTT CATT C TCTGCTTTTTATT C T T CTC 112  
 Rhesus TTCTCTATTTTTC -----CTTGACTCTCTT CATT C TCTGCTTTTTATT C T T CTG 112  
 \*\*\*\*\*

14bp human-specific deletion polymorphism

40bp duplicon unit A

40bp duplicon unit B

Human **CTT (CATT C) CCTCTCCAT AAATGACAGACCTTTTCTTAGATGCCATTCT TTCTCCTTAA** 180  
 Chimp CTT CATT C CCTCTCCAT AAATGACAGACCTTTTCTTAGATG----- 153  
 Rhesus CTT CACTT CCTCTCCAT AAATGACAGACCTTTTCTTAGATG----- 153  
 \*\*\* \*\* \*

5bp deletion

40bp duplicon unit

Human **TAACAGACCTTTTCTTATATGCCATTCT** CTATGCTGCGCTTAAGA **CAAGA** ATTTTTTT 240  
 Chimp -----CCATTCT CTATGCTGCGCTTAAGA CAAGA ATTTTTTT- 191  
 Rhesus -----CCATTCT CTATATCTGCGCTTACAA CAAGA ATTTTTTT- 191  
 \*\*\*\*\*

Human CCTCCTAGTTGTTGGTAAATGCTGCAAAATGTGAGAGCATGTTAACATGACAAACAACA 300  
 Chimp CCTCCTAGTTGTTGGTAAATGCTGCAAAATGTGAGAGCACGTTAACATGACAAACAACA 251  
 Rhesus CCTCCTAGTTGTTGGTAAATGCTGCAAAATGTGAGAGAATGTTAACATGACAAACAACA 251  
 \*\*\*\*\*

Human GGAATTTGAAATAAACTTAAATGAAACAGTGTCTTTTCTCCCCCTACTCTCCCCACCCC 360  
 Chimp GGAATTTGAAATAAACTTAAATGAAACAGTGTCTTTTCTCCCCCTACTCTCCCCACCCC 311  
 Rhesus GGAATTCGAAATAAACTTAAATGAAACAGTGTCTTTTCTCCCCCTACTCTCCCCACCCC 311  
 \*\*\*\*\*

Human CCATGGTGAAATGATGATATCCTTACCATCTGCACACTTGC----- 402  
 Chimp CCATGGTGAAATGATGATATCCTTACCATCTGCACACTTGC----- 353  
 Rhesus CCATGGTGAAATGATGATATCCTTACCATCTGCACACTTGCAGGCTGT 360  
 \*\*\*\*\*
